# Supplementary material for: High-sensitivity determination of Cd isotopes in low-Cd geological samples by double spike MC-ICP-MS
Source: Royal Society of Chemistry journal article supplement (doi:10.1039/c9ja00397e), 2020-01-01

## **High-sensitivity determination of Cd isotopes of low-Cd geological samples by double spike MC-ICP-MS**

Decan Tan <sup>a, c</sup>, Jian-Ming Zhu <sup>b\*</sup>, Xiangli Wang <sup>d, e</sup>, Guilin Han <sup>b</sup>, Zhuo Lu <sup>b</sup>, Wenpo Xu <sup>a, c</sup>

<sup>a</sup> State Key Laboratory of Environmental Geochemistry, Institute of Geochemistry, Chinese Academy of Sciences, Guiyang, 550081, China

<sup>b</sup> State Key Laboratory of Geological Processes and Mineral Resources, China University of Geosciences (Beijing), Beijing 100083, China

<sup>c</sup> University of Chinese Academy of Sciences, Beijing 100049, China

<sup>d</sup> Department of Marine Sciences, University of South Alabama, Mobile, AL 36688, USA

<sup>e</sup> Dauphin Island Sea Lab, Dauphin Island, AL 36528, USA

\* Corresponding author: Jian-Ming Zhu

Phone: 86-010-82322832; E-mail: [jmzhu@cugb.edu.cn](mailto:jmzhu@cugb.edu.cn)

**Table S1** Reported methods and the total procedural blanks for Cd separation

| Reference                                        | Resin*                 | Sample type              | The lowest Cd in Sample ( $\mu\text{g g}^{-1}$ ) | Blank ng      | Yield (%) |
|--------------------------------------------------|------------------------|--------------------------|--------------------------------------------------|---------------|-----------|
| <b>Single-column purification scheme</b>         |                        |                          |                                                  |               |           |
| Cloquet <i>et al.</i> (2005) <sup>36</sup>       | AGMP-1M                | Geological samples       | 4                                                | 0.2           | >95       |
| Cloquet <i>et al.</i> (2006) <sup>30</sup>       | AGMP-1M                | Soil                     | 2                                                | 0.2           | -         |
| Gao <i>et al.</i> (2008) <sup>37</sup>           | AGMP-1M                | Sediment                 | 23                                               | 0.2           | >90       |
| Conway <i>et al.</i> (2013) <sup>16</sup>        | Nobias PA-1<br>AGMP-1M | Seawater                 |                                                  | 0.004         | n.d.      |
| Pallavicini <i>et al.</i> (2014) <sup>38</sup>   | AGMP-1M                | Environmental samples    | 0.07                                             | n.d.          | >95       |
| Wei <i>et al.</i> (2015) <sup>39</sup>           | AGMP-1M                | Plant                    | 0.37                                             | n.d.          | >95       |
| Zhang <i>et al.</i> (2018) <sup>41</sup>         | AGMP-1M                | Carbonates               | 33                                               | <0.07         | >90       |
| Yang <i>et al.</i> (2019) <sup>40</sup>          | AGMP-1M                | water and Sediment       | 18                                               | n.d.          | >97       |
| <b>Two-column purification scheme</b>            |                        |                          |                                                  |               |           |
| Wombacher <i>et al.</i> (2003) <sup>11</sup>     | AG1-X8<br>TRU Spec     | Chondrites, Basalt, etc. | n.d.                                             | <0.02         | n.d.      |
| Horner <i>et al.</i> (2010) <sup>12</sup>        | AG1-X8<br>TRU Spec     | Fe-Mn crusts             | 1.7                                              | 0.005         | n.d.      |
| Gault-Ringold <i>et al.</i> (2012) <sup>14</sup> | AG1-X8<br>TRU-Spec     | Seawater                 |                                                  | 0.055         | >90       |
| Xue <i>et al.</i> (2012) <sup>13</sup>           | AG1-X8<br>TRU Spec     | Seawater                 |                                                  | 0.02-<br>0.03 | >85       |
| Kruijjer <i>et al.</i> (2013) <sup>43</sup>      | AG1-X8<br>TRU-Spec     | Meteorite                | 0.0004                                           | 0.03          | >80       |
| Martinková <i>et al.</i> (2015) <sup>19</sup>    | AG-1- X8<br>TRU Spec   | Environmental samples    | 5.24                                             | n.d.          | >94       |
| Wiggenhauser <i>et al.</i> (2016) <sup>44</sup>  | AG1-X8<br>TRU Spec     | Plant                    | -                                                | < 0.53        | -         |
| Fouskas <i>et al.</i> (2018) <sup>45</sup>       | AG1-X8<br>TRU-Spec     | Plant                    | 0.1                                              | -             | 95        |
| <b>Other purification scheme for TIMS</b>        |                        |                          |                                                  |               |           |
| Schmitt <i>et al.</i> (2009) <sup>56</sup>       | AG1-X8                 | Basalt, Sulphides        | 0.1                                              | <0.16         | n.d.      |
| Abouchami <i>et al.</i> (2011) <sup>29</sup>     | AG1-X8                 | Seawater                 | -                                                | 0.015         | 96        |
| Hohl <i>et al.</i> (2017) <sup>21</sup>          | AG1-X8                 | Carbonates               | 0.02                                             |               |           |

\* AG-x8 contains two different mesh, such as 100-200 mesh and 200-400 mesh

**Table S2** The description of geological reference materials

| Sample name | Cd ( $\mu\text{g g}^{-1}$ ) | Description                                                                                |
|-------------|-----------------------------|--------------------------------------------------------------------------------------------|
| BCR-2       | 0.69                        | Columbia River basalt                                                                      |
| BHVO-2      | 0.15                        | Hawaiian volcanic basalt                                                                   |
| SGR-1b      | 0.90                        | Petroleum and carbonate-rich shale from the Mahogany zone of the Green River Formation     |
| NOD-A-1     | 6.50                        | Manganese nodules from the Atlantic Oceans at a depth of 788 meters                        |
| NOD-P-1     | 22.30                       | Manganese nodules from the Pacific Oceans at a depth of 4,300 meters                       |
| SRM 2711a   | 54.10                       | Montana II Soil                                                                            |
| GSS-1       | 4.30                        | Brown soil from Xilin Lead-Zinc Mine, Heilongjiang Province, China                         |
| GSS-4       | 0.35                        | Limestone weathered soil in Yishan, Guangxi Province, China                                |
| GSS-5       | 0.45                        | Yellow-red soil in Qibaoshan skarn copper polymetallic ore district, Hunan Province, China |
| GSS-14      | 0.20                        | Agricultural soil of a tillage layer form sichuan basin, Sichuan Province, China           |
| GSD-5a      | 1.37                        | River sediment from Tongling skarn copper mining area, Anhui Province, China               |
| GSD-6       | 0.43                        | River sediment from Zhadou porphyry copper mining area, Qinghai Province, China            |
| GSD-7a      | 5.60                        | River sediment from Kaiyuan lead zinc mining area, Liaoning Province, China                |
| GSD-10      | 1.12                        | River sediment from Yishan carbonate area, Guangxi Province, China                         |
| GSD-11      | 2.30                        | River sediment from Shizhuyuan polymetallic mining area, Hunan Province, China             |
| GSD-12      | 4.00                        | River sediment from Yangchun polymetallic mining area in Guangdong Province, China         |
| GSD-17      | 4.30                        | River sediment from Xiaoxilin lead zinc mining area, Yichun, Heilongjiang Province, China  |
| GSD-21      | 0.76                        | River sediment from Xiaorequanzi copper mining area, Turpan, Xinjiang Province, China      |
| GSD-23      | 4.80                        | River sediment from Yinshan polymetallic mining area, Dexing, Jiangxi Province, China      |
| GSH-1       | 0.38                        | Shrub branches and leaves from Xitianshan lead zinc mining area, Qinghai Province, China   |
| GSV-2       | 0.11                        | Human hair from Langfang City, Hebei Province, China                                       |

**Table S3** Calibrated isotope ratios of the double spike and NIST SRM 3108 using  $^{107}\text{Ag}/^{109}\text{Ag}$  = 1.076378 to correct for instrument mass bias.

|               | $^{106}\text{Cd}/^{110}\text{Cd}$ | $^{108}\text{Cd}/^{110}\text{Cd}$ | $^{111}\text{Cd}/^{110}\text{Cd}$ | $^{112}\text{Cd}/^{110}\text{Cd}$ | $^{113}\text{Cd}/^{110}\text{Cd}$ | $^{114}\text{Cd}/^{110}\text{Cd}$ | $^{116}\text{Cd}/^{110}\text{Cd}$ |
|---------------|-----------------------------------|-----------------------------------|-----------------------------------|-----------------------------------|-----------------------------------|-----------------------------------|-----------------------------------|
| Double spike  | 0.022118                          | 0.03056                           | 59.02343                          | 1.905029                          | 38.08632                          | 0.854083                          | 0.0523                            |
| NIST SRM 3108 | 0.099814                          | 0.071194                          | 1.026207                          | 1.932893                          | 0.980063                          | 2.303989                          | 0.601450                          |

**Table S4** Ratios of matrix elements and cadmium in different types of samples

| Sample  | Data origin                                  | Mg/Cd  | Fe/Cd  | Zn/Cd | Ga/Cd | Ge/Cd | Zr/Cd | Mo/Cd | Pb/Cd |
|---------|----------------------------------------------|--------|--------|-------|-------|-------|-------|-------|-------|
| BHVO-2  | Jochum <i>et al.</i><br>(2016) <sup>64</sup> | 197727 | 410455 | 472   | 97.1  | 7.42  | 778   | 18.5  | 7.51  |
| BCR-2   | Jochum <i>et al.</i><br>(2016) <sup>64</sup> | 67500  | 301219 | 405   | 69    | 4.56  | 583   | 783   | 34.2  |
| NOD-A-1 | USGS                                         | 5490   | 21081  | 114   | -     | -     | -     | 86.5  | 163   |
| NOD-P-1 | USGS                                         | 5130   | 15052  | 415   | -     | -     | -     | 197   | 145   |
| SGR-1b  | USGS                                         | 40985  | 32631  | 114   | 18.5  | -     | 81.5  | 53.8  | 58.5  |
| 2711a   | NIST                                         | 5130   | 15052  | 415   | -     | -     | -     | 197   | 145   |
| GSS-1   | GGE                                          | 7145   | 23901  | 447   | 12.6  | 0.88  | 161   | 0.92  | 64.5  |
| GSS-4   | IGGE                                         | 9188   | 225313 | 656   | 96.9  | 5.94  | 1563  | 8.13  | 181   |
| GSS-5   | IGGE                                         | 9385   | 226513 | 1267  | 82.1  | 6.67  | 697   | 11.8  | 1415  |
| GSS-14  | IGGE                                         | 60000  | 196000 | 505   | 98.9  | 7.47  | 1195  | 3.42  | 163   |
| GSD-5a  | IGGE                                         | 6242   | 29750  | 212   | 15.1  | 1.28  | 222   | 1.32  | 82.3  |
| GSD-6   | IGGE                                         | 2896   | 5649   | 151   | 2.78  | 0.22  | 35.5  | 0.16  | 107   |
| GSD-7a  | IGGE                                         | 41860  | 95721  | 335   | 38.8  | 3.02  | 395   | 17.9  | 62.8  |
| GSD-10  | IGGE                                         | 947    | 35553  | 61    | 24.3  | 0.53  | 92.1  | 1.58  | 35.5  |
| GSD-11  | IGGE                                         | 5027   | 41527  | 504   | 25.3  | 2.45  | 207   | 7.97  | 859   |
| GSD-12  | IGGE                                         | 1492   | 18074  | 263   | 7.46  | 0.99  | 124   | 4.34  | 151   |
| GSD-17  | IGGE                                         | 2005   | 8850   | 150   | 4.59  | 0.3   | 56.7  | 0.41  | 88.3  |
| GSD-21  | IGGE                                         | 16986  | 47324  | 407   | 22.1  | 1.49  | 252   | 2.39  | 36.6  |
| GSD-23  | IGGE                                         | 1834   | 12066  | 214   | 5.26  | 0.43  | 58.9  | 0.38  | 30.8  |
| GSH-1   | IGGE                                         | 0.36   | 540    | 1900  | -     | -     | -     | 0.73  | 88    |
| GSV-2   | GGE                                          | 0.92   | 2058   | 106   | -     | -     | -     | 0.54  | 90.4  |

**Table S5** Cd isotopic compositions of common standard solutions

| Standard solution                                | Reference                                        | $\delta^{114/110}\text{Cd}$ | 2SD          | N <sup>b</sup>   | Method                                  | Instrument                              |
|--------------------------------------------------|--------------------------------------------------|-----------------------------|--------------|------------------|-----------------------------------------|-----------------------------------------|
| NIST 3018                                        | This study                                       | 0.000                       | 0.064        | 31               | <sup>111</sup> Cd- <sup>113</sup> Cd DS | Nu II                                   |
|                                                  | This study                                       | 0.000                       | 0.034        | 181 <sup>c</sup> | <sup>111</sup> Cd- <sup>113</sup> Cd DS | Nu III/ NP                              |
|                                                  | <b>Average</b>                                   | <b>0.000</b>                | <b>0.040</b> | <b>212</b>       |                                         |                                         |
| NIST 3018 <sub>ICL</sub>                         | This study                                       | 0.014                       | 0.048        | 9                | <sup>111</sup> Cd- <sup>113</sup> Cd DS | Nu II                                   |
|                                                  | This study                                       | 0.003                       | 0.035        | 13               | <sup>111</sup> Cd- <sup>113</sup> Cd DS | Nu III/ NP                              |
|                                                  | <b>Average</b>                                   | <b>0.007</b>                | <b>0.041</b> | <b>22</b>        |                                         |                                         |
| Münster Cd                                       | This study                                       | 4.471                       | 0.072        | 7                | <sup>111</sup> Cd- <sup>113</sup> Cd DS | Nu II                                   |
|                                                  | This study                                       | 4.457                       | 0.028        | 12               | <sup>111</sup> Cd- <sup>113</sup> Cd DS | Nu III/ NP                              |
|                                                  | <b>Average</b>                                   | <b>4.461</b>                | <b>0.047</b> | <b>19</b>        |                                         |                                         |
|                                                  | Cloquet <i>et al.</i> (2005) <sup>36</sup>       | 4.499 <sup>a</sup>          | 0.004        |                  | SSB                                     | GV                                      |
|                                                  | Ripperger and Rehkämper,(2007) <sup>35</sup>     | 4.497 <sup>a</sup>          | 0.120        |                  | <sup>110</sup> Cd- <sup>111</sup> Cd DS | Nu I                                    |
|                                                  | Gao <i>et al.</i> (2008) <sup>37</sup>           | 4.467 <sup>a</sup>          | 0.130        |                  | SSB                                     | GV                                      |
|                                                  | Schmitt <i>et al.</i> (2009a) <sup>36</sup>      | 4.446 <sup>a</sup>          | 0.017        |                  | <sup>106</sup> Cd- <sup>108</sup> Cd DS | TIMS                                    |
|                                                  | Schmitt <i>et al.</i> (2009b) <sup>62</sup>      | 4.443 <sup>a</sup>          | 0.017        |                  | <sup>106</sup> Cd- <sup>108</sup> Cd DS | TIMS                                    |
|                                                  | Abouchami <i>et al.</i> (2012) <sup>50</sup>     | 4.499                       | 0.050        |                  |                                         |                                         |
|                                                  | Gault-Ringold <i>et al.</i> (2012) <sup>14</sup> | 4.51                        | 0.130        | 12               | <sup>110</sup> Cd- <sup>111</sup> Cd DS | Nu I                                    |
|                                                  | Xue <i>et al.</i> (2012) <sup>13</sup>           | 4.531 <sup>a</sup>          | 0.050        |                  | <sup>111</sup> Cd- <sup>113</sup> Cd DS | Nu I                                    |
|                                                  | Conway <i>et al.</i> (2013) <sup>16</sup>        | 4.486                       | 0.060        |                  | <sup>110</sup> Cd- <sup>111</sup> Cd DS | NP                                      |
|                                                  | Fouskas <i>et al.</i> (2018) <sup>35</sup>       | 4.54                        | 0.130        | 6                | Ag correction                           | Nu I                                    |
|                                                  | Zhang <i>et al.</i> (2018) <sup>41</sup>         | 4.4.6                       | 0.060        |                  | SSB                                     | NP                                      |
|                                                  | Yang <i>et al.</i> (2019) <sup>40</sup>          | 4.4.3                       | 0.060        |                  | SSB                                     | NP                                      |
|                                                  | Liu <i>et al.</i> (2019) <sup>46</sup>           | 4.455                       | 0.047        |                  | <sup>111</sup> Cd- <sup>113</sup> Cd DS | NP                                      |
|                                                  | BAM-I012                                         | This study                  | -1.336       | 0.064            | 9                                       | <sup>111</sup> Cd- <sup>113</sup> Cd DS |
| This study                                       |                                                  | -1.323                      | 0.028        | 12               | <sup>111</sup> Cd- <sup>113</sup> Cd DS | Nu III/ NP                              |
| <b>Average</b>                                   |                                                  | <b>-1.329</b>               | <b>0.045</b> | <b>21</b>        |                                         |                                         |
| Ripperger and Rehkämper,(2007) <sup>35</sup>     |                                                  | -1.378 <sup>a</sup>         | 0.110        |                  | <sup>110</sup> Cd- <sup>111</sup> Cd DS | Nu I                                    |
| Shiel <i>et al.</i> (2009) <sup>59</sup>         |                                                  | -1.251                      | 0.035        |                  | SSB                                     | Nu I                                    |
| Schmitt <i>et al.</i> (2009a) <sup>56</sup>      |                                                  | -1.313 <sup>a</sup>         | 0.013        |                  | <sup>106</sup> Cd- <sup>108</sup> Cd DS | TIMS                                    |
| Horner <i>et al.</i> (2011) <sup>12</sup>        |                                                  | -1.296 <sup>a</sup>         | 0.090        |                  | <sup>111</sup> Cd- <sup>112</sup> Cd DS | Nu I                                    |
| Abouchami <i>et al.</i> (2012) <sup>50</sup>     |                                                  | -1.332                      | 0.040        |                  |                                         |                                         |
| Gault-Ringold <i>et al.</i> (2012) <sup>14</sup> |                                                  | -1.360                      | 0.140        |                  | <sup>110</sup> Cd- <sup>111</sup> Cd DS | Nu I                                    |
| Xue <i>et al.</i> (2012) <sup>13</sup>           |                                                  | -1.329 <sup>a</sup>         | 0.080        |                  | <sup>111</sup> Cd- <sup>113</sup> Cd DS | Nu I                                    |
| Gao <i>et al.</i> (2013) <sup>37</sup>           |                                                  | -1.260 <sup>a</sup>         | 0.100        |                  | SSB                                     | GV                                      |
| Lambelet <i>et al.</i> (2013) <sup>17</sup>      |                                                  | -1.330                      | 0.100        |                  | <sup>111</sup> Cd- <sup>113</sup> Cd DS | Nu I                                    |
| Fouskas <i>et al.</i> (2018) <sup>45</sup>       |                                                  | -1.340                      | 0.150        |                  | Ag correction                           | Nu I                                    |
| Li <i>et al.</i> (2018) <sup>42</sup>            |                                                  | -1.310                      | 0.090        |                  | SSB                                     | NP                                      |
| Liu <i>et al.</i> (2019) <sup>46</sup>           |                                                  | -1.325                      | 0.043        |                  | <sup>111</sup> Cd- <sup>113</sup> Cd DS | NP                                      |

**Table S5 (Contd.)**

| Standard solution | Reference                             | $\delta^{114/110}\text{Cd}$ | 2SD           | N <sup>b</sup> | Method                                  | Instrument |
|-------------------|---------------------------------------|-----------------------------|---------------|----------------|-----------------------------------------|------------|
| Spex Cd-CUGB      | This study                            | -2.138                      | 0.065         | 5              | <sup>111</sup> Cd- <sup>113</sup> Cd DS | Nu II      |
|                   | This study                            | -2.117                      | 0.040         | 13             | <sup>111</sup> Cd- <sup>113</sup> Cd DS | Nu III/ NP |
|                   | <b>Average</b>                        | <b>-2.121</b>               | <b>0.0420</b> | <b>18</b>      |                                         |            |
|                   | Li <i>et al.</i> (2018) <sup>42</sup> | -2.13                       | 0.090         | 74             | SSB                                     | NP         |

\*: The  $\delta^{114/110}\text{Cd}$  values in previous studies were recalculated relative to NIST SRM 3108, according to Abouchami *et al.* (2012)<sup>50</sup>.

•: The number repeated measurements.

•: Data include measuring at concentrations of 5ng mL<sup>-1</sup>, 10 ng mL<sup>-1</sup>, 20 ng mL<sup>-1</sup> and 25 ng mL<sup>-1</sup> (0.000±0.030‰, 2SD,n=64)for NP, and 25 ng mL<sup>-1</sup> (0.000±0.030‰, 2SD,n=55)and 50 ng mL<sup>-1</sup> for Nu III.

**Fig. S1** Elution curves of the Cd purification procedures using AG-MP-1M anion exchange resin

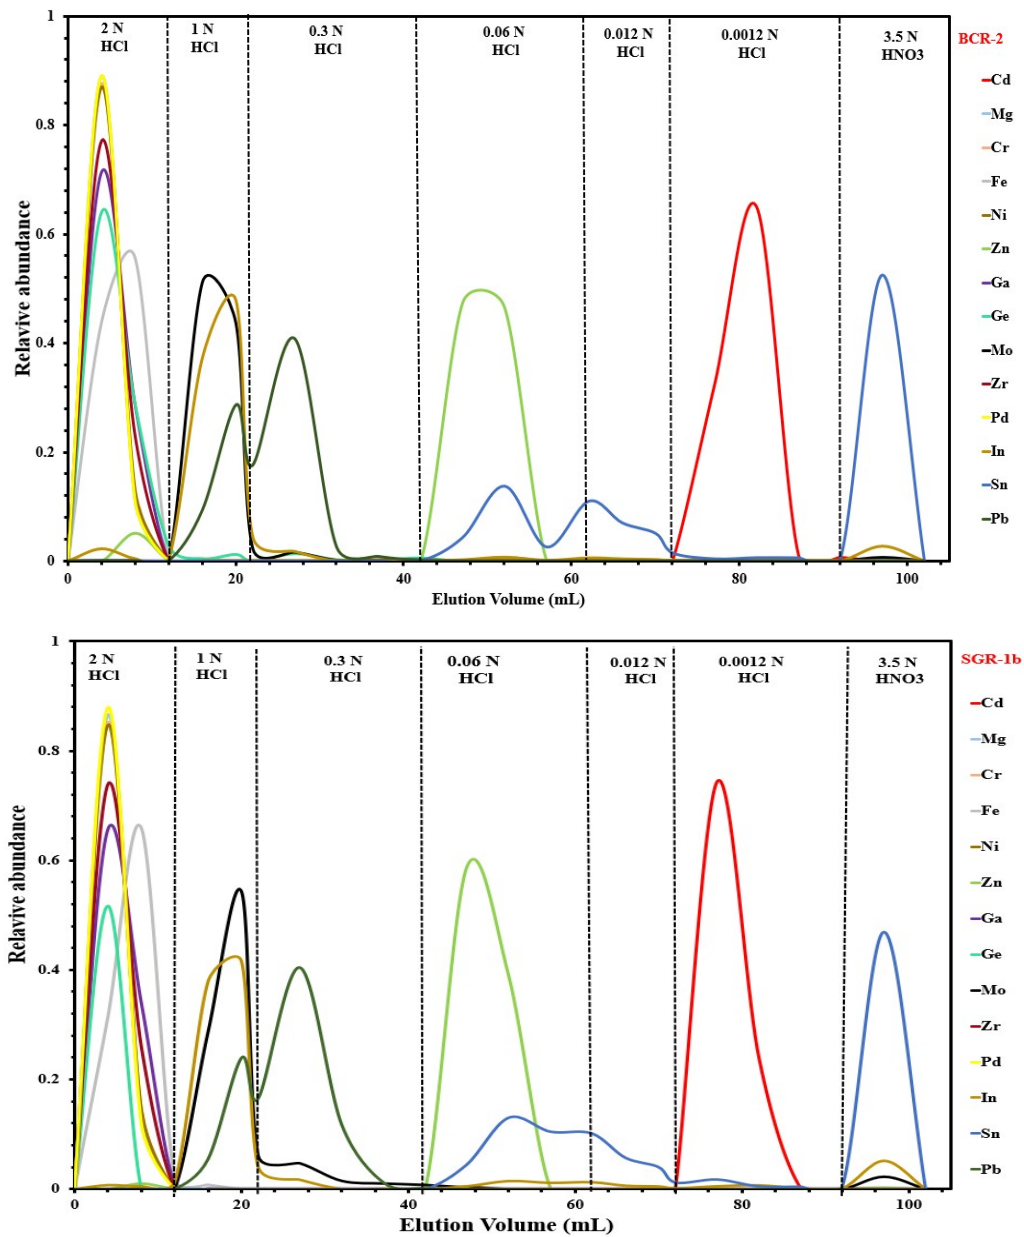

**Fig. S2** Effectiveness of purification procedures at removing matrix elements for BHVO-2 (A and B) and SGR-1b (C and D). X denotes a matrix element, and X/Cd is the concentration ratio of matrix elements to Cd. Figures A and C shows the value of X/Cd before purification and figures B and D is the ratios after purification.

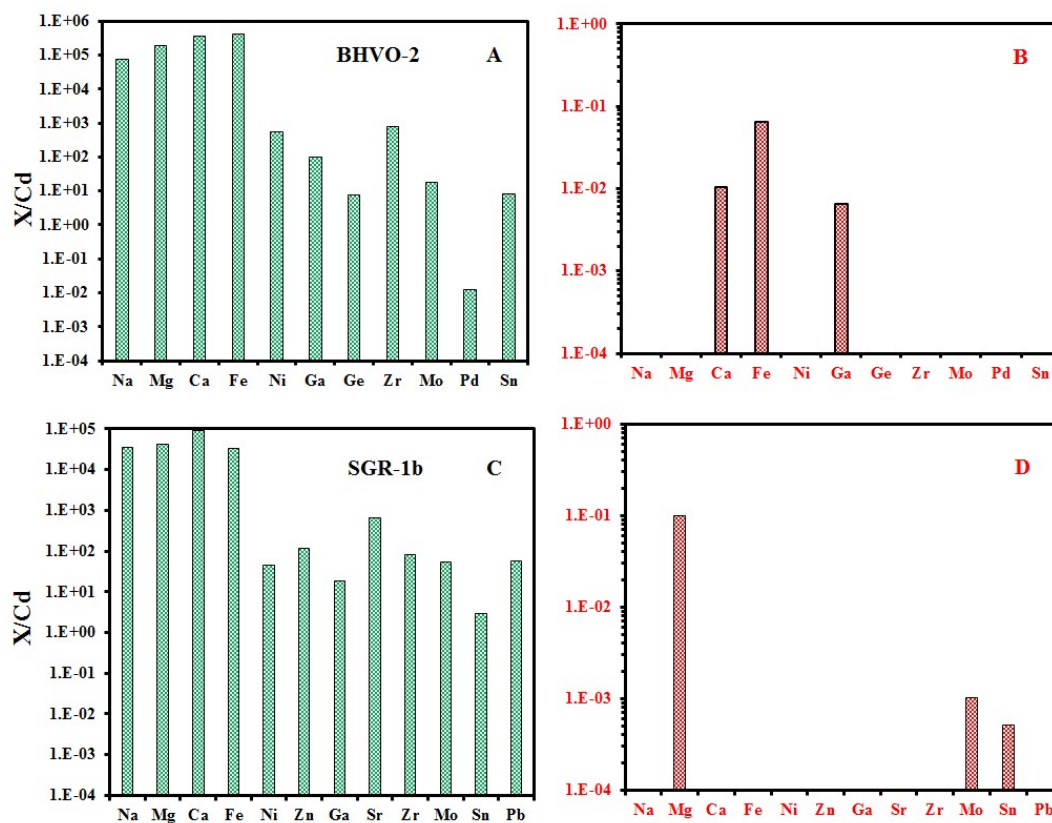

**Fig. S3** The effects of Ge and Fe on measured  $\delta^{114/110}\text{Cd}$ . The gray band is the average external precision on Nu II, Nu III and Neptune Plus ( $\pm 0.040\%$ )

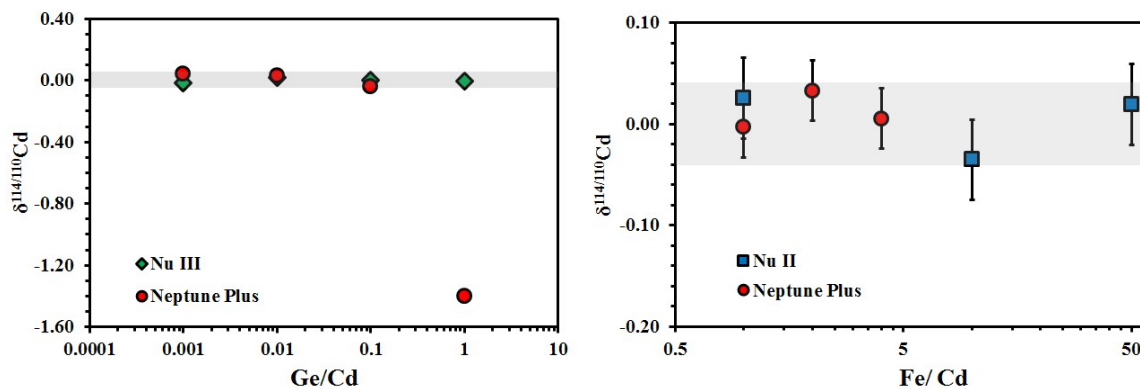

Supplement: c9ja00397e1.pdf [file c9ja00397e1.pdf]
